# Supplementary material
Source: publisher figshare collection journal article supplement (https://karger.figshare.com/ndownloader/files/30937555)

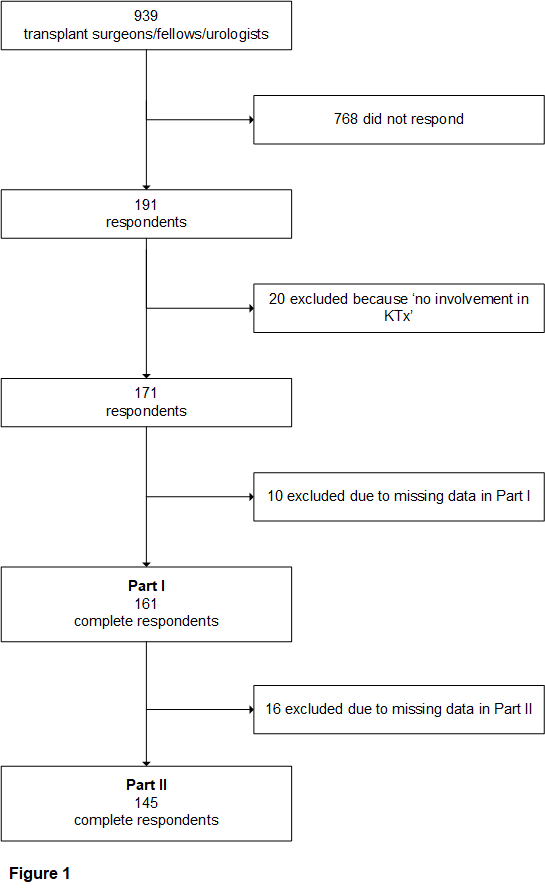


**Figure S2.** Flowchart of included respondents

Supplement: Supplementary file 1 [file 30937555]
